# Supplementary material for: Scoliosis Related Information on the Internet in China: Can Patients Benefit from This Information?
Source: PubMed Central journal article supplement (PMC4331504; doi:10.1371/journal.pone.0118289), 2015-02-17
Supplement: pone.0118289.s002.pdf [file pone.0118289.s002.pdf]

# DISCERN

**An instrument for judging the quality  
of written consumer health information on  
treatment choices**

**Funded by The British Library**

*For further information please contact:*

Sasha Shepperd

University of Oxford

Division of Public Health and Primary Health Care

Institute of Health Sciences

Old Road

Headington

Oxford OX3 7LF

## Section I

### IS THE PUBLICATION RELIABLE?

#### 1 Are the aims clear?

|    |   |           |   |     |
|----|---|-----------|---|-----|
| No |   | Partially |   | Yes |
| 1  | 2 | 3         | 4 | 5   |

**HINT** Look for a clear indication at the beginning of the publication of:

- what it is about
- what it is meant to cover (and what topics are meant to be excluded)
- who might find it useful.

If the answer to Question 1 is 'No', go directly to Question 3

#### 2 Does it achieve its aims?

|    |   |           |   |     |
|----|---|-----------|---|-----|
| No |   | Partially |   | Yes |
| 1  | 2 | 3         | 4 | 5   |

**HINT** Consider whether the publication provides the information it aimed to as outlined in Question 1.

#### 3 Is it relevant?

|    |   |           |   |     |
|----|---|-----------|---|-----|
| No |   | Partially |   | Yes |
| 1  | 2 | 3         | 4 | 5   |

**HINT** Consider whether:

- the publication addresses the questions that readers might ask
- recommendations and suggestions concerning treatment choices are realistic or appropriate.

#### 4 Is it clear what sources of information were used to compile the publication (other than the author or producer)?

|    |   |           |   |     |
|----|---|-----------|---|-----|
| No |   | Partially |   | Yes |
| 1  | 2 | 3         | 4 | 5   |

#### HINT

- Check whether the main claims or statements made about treatment choices are accompanied by a reference to the sources used as evidence, e.g. a research study or expert opinion.
- Look for a means of checking the sources used such as a bibliography/reference list or the addresses of the experts or organisations quoted.

**Rating note:** In order to score a full '5' the publication should fulfil both hints. Lists of *additional* sources of support and information (Q7) are not necessarily sources of *evidence* for the current publication.

#### 5 Is it clear when the information used or reported in the publication was produced?

|    |   |           |   |     |
|----|---|-----------|---|-----|
| No |   | Partially |   | Yes |
| 1  | 2 | 3         | 4 | 5   |

#### HINT Look for:

- dates of the main sources of information used to compile the publication
- date of any revisions of the publication (but not dates of reprinting)
- date of publication (copyright date).

**Rating note:** The hints are placed in order of importance – in order to score a full '5' the dates relating to the first hint should be found.

## 6 Is it balanced and unbiased?

|    |   |           |   |     |
|----|---|-----------|---|-----|
| No |   | Partially |   | Yes |
| 1  | 2 | 3         | 4 | 5   |

**HINT** Look for:

- a clear indication of whether the publication is written from a personal or objective point of view
- evidence that a *range* of sources of information was used to compile the publication, e.g. more than one research study or expert
- evidence of an external assessment of the publication.

Be wary if:

- the publication focuses on the advantages or disadvantages of one particular treatment choice without reference to other possible choices
- the publication relies primarily on evidence from single cases (which may not be typical of people with this condition or of responses to a particular treatment)
- the information is presented in a sensational, emotive or alarmist way.

## 7 Does it provide details of additional sources of support and information?

|    |   |           |   |     |
|----|---|-----------|---|-----|
| No |   | Partially |   | Yes |
| 1  | 2 | 3         | 4 | 5   |

**HINT** Look for suggestions for further reading or for details of other organisations providing advice and information about the condition and treatment choices.

## 8 Does it refer to areas of uncertainty?

|    |   |           |   |     |
|----|---|-----------|---|-----|
| No |   | Partially |   | Yes |
| 1  | 2 | 3         | 4 | 5   |

**HINT**

- Look for discussion of the gaps in knowledge or differences in expert opinion concerning treatment choices.
- Be wary if the publication implies that a treatment choice affects everyone in the same way, e.g. 100% success rate with a particular treatment.

## Section 2

### HOW GOOD IS THE QUALITY OF INFORMATION ON TREATMENT CHOICES?

N.B. The questions apply to the treatment (or treatments) described in the *publication*. Self-care is considered a form of treatment throughout this section.

#### 9 Does it describe how each treatment works?

|    |   |           |   |     |
|----|---|-----------|---|-----|
| No |   | Partially |   | Yes |
| 1  | 2 | 3         | 4 | 5   |

**HINT** Look for a description of how a treatment acts on the body to achieve its effect.

#### 10 Does it describe the benefits of each treatment?

|    |   |           |   |     |
|----|---|-----------|---|-----|
| No |   | Partially |   | Yes |
| 1  | 2 | 3         | 4 | 5   |

**HINT** Benefits can include controlling or getting rid of symptoms, preventing recurrence of the condition and eliminating the condition, both short-term and long-term.

#### 11 Does it describe the risks of each treatment?

|    |   |           |   |     |
|----|---|-----------|---|-----|
| No |   | Partially |   | Yes |
| 1  | 2 | 3         | 4 | 5   |

**HINT** Risks can include side-effects, complications and adverse reactions to treatment, both short-term and long-term.

## **I2 Does it describe what would happen if no treatment is used?**

|    |   |           |   |     |
|----|---|-----------|---|-----|
| No |   | Partially |   | Yes |
| 1  | 2 | 3         | 4 | 5   |

**HINT** Look for a description of the risks and benefits of postponing treatment, of watchful waiting (i.e. monitoring how the condition progresses without treatment) or of permanently forgoing treatment.

## **I3 Does it describe how the treatment choices affect overall quality of life?**

|    |   |           |   |     |
|----|---|-----------|---|-----|
| No |   | Partially |   | Yes |
| 1  | 2 | 3         | 4 | 5   |

**HINT** Look for:

- description of the effects of the treatment choices on day-to-day activity
- description of the effects of the treatment choices on relationships with family, friends and carers.

## **I4 Is it clear that there may be more than one possible treatment choice?**

|    |   |           |   |     |
|----|---|-----------|---|-----|
| No |   | Partially |   | Yes |
| 1  | 2 | 3         | 4 | 5   |

**HINT** Look for:

- a description of who is most likely to benefit from each treatment choice mentioned, and under what circumstances
- suggestions of alternatives to consider or investigate further (including choices not fully described in the publication) before deciding whether to select or reject a particular treatment choice.

### 15 Does it provide support for shared decision-making?

|    |   |           |   |     |
|----|---|-----------|---|-----|
| No |   | Partially |   | Yes |
| 1  | 2 | 3         | 4 | 5   |

**HINT** Look for suggestions of things to discuss with family, friends, doctors or other health professionals concerning treatment choices.

---

## Section 3

### OVERALL RATING OF THE PUBLICATION

**16 Based on the answers to all of the above questions, rate the overall quality of the publication as a source of information about treatment choices**

|                                                  |   |                                                                       |   |                                 |
|--------------------------------------------------|---|-----------------------------------------------------------------------|---|---------------------------------|
| Low                                              |   | Moderate                                                              |   | High                            |
| <i>Serious or<br/>extensive<br/>shortcomings</i> |   | <i>Potentially<br/>important<br/>but not serious<br/>shortcomings</i> |   | <i>Minimal<br/>shortcomings</i> |
| 1                                                | 2 | 3                                                                     | 4 | 5                               |
