# Supplementary material for: Scoliosis Related Information on the Internet in China: Can Patients Benefit from This Information?
Source: PLoS One. 2015 Feb 17;10(2):e0118289. doi: 10.1371/journal.pone.0118289 (PMC4331504; doi:10.1371/journal.pone.0118289)
Supplement: S1 Questionnaire — (PDF) [file pone.0118289.s001.pdf]

## 脊柱侧弯患者网络使用情况调查

为了了解您对脊柱侧弯相关知识的获取渠道，我们邀请您填写一份调查问卷，希望通过这份问卷提高网络上脊柱侧弯相关知识的质量，谢谢您！

您的孩子的性别：☐ 男 ☐ 女 年龄（周岁）：

你的性别：☐ 男 ☐ 女

你的年龄：☐ 20-30 岁 ☐ 30-40 岁 ☐ 40 岁以上

1、您目前的学历是什么？

☐ 小学 ☐ 初中 ☐ 高中 ☐ 大学及以上

2、您的孩子这次来看病属于哪种情况？

☐ 第一次发现脊柱侧弯  
☐ 以前发现脊柱侧弯，本次是随访  
☐ 已经进行脊柱侧弯手术，是术后复查

3、如果您的孩子已经进行了脊柱侧弯手术，术后有没有并发症？

☐ 有 ☐ 没有

4、您的家庭住址属于：

☐ 城市 ☐ 农村

5、您的家庭中是否有网络覆盖？

☐ 有 ☐ 没有

6、您是否经常使用网络？

☐ 是 ☐ 不是

7、你之前是否在网络上搜索过脊柱侧弯相关的知识？

☐ 有 ☐ 没有

8、如果您曾经搜索过侧弯相关知识，这样的搜索是谁进行的？

☐ 我自己 ☐ 朋友或亲戚的帮助

9、你在刚刚发现孩子脊柱侧弯，但没有看门诊时，是否上网搜索相关知识？

☐ 有 ☐ 没有

10、你是否与您的主诊医生共享你查到的信息？

☐ 有 ☐ 没有

- 11、 如果您使用过网络获取脊柱侧弯相关知识，你觉得有没有给你带来更多的疑问？  
☐有 ☐没有
- 12、 您是怎样找到脊柱侧弯相关网站的？  
☐网络搜索引擎  
☐朋友推荐  
☐医生推荐  
☐病友推荐
- 13、 您经常使用什么搜索引擎搜索侧弯相关知识？  
☐百度 ☐谷歌 ☐搜狗 ☐360 搜索
- 14、 您觉得上网络搜索脊柱侧弯知识是否有帮助？  
☐有 ☐没有
- 15、 您觉得网络上的知识是否会让您对孩子的病情更焦虑？  
☐会 ☐不会
- 16、 您是否给病友推荐过比较好的脊柱侧弯网站？  
☐有 ☐没有
- 17、 您是否曾经遇到令人困惑的网站？  
☐有 ☐没有
- 18、 你上网搜索脊柱侧弯相关知识，主要是为了什么？  
☐疾病的病因  
☐侧弯的预后如何  
☐侧弯的治疗手段  
☐希望了解比较全面的信息
- 19、 您觉得网上的知识在多大程度上可以解答您的问题？请在下方的直线上标出来，  
最左边表示完全不能解答，最右边表示可以完全解答。

---

0%，完全不能解答

100%，可以完全解答

**感谢您参与我们的调查，您的参与是对我们最大的支持！**

**我们一贯致力于为患者提供最好的脊柱侧弯诊疗方案，感谢您为这个目标做出贡献！**
